# Supplementary material for: Urinary Tract Infection Frequency and Prescription Prophylaxis in Females and Males with Recurrent Urinary Tract Infection
Source: MDPI journal article supplement (doi:10.3390/pathogens12020170), 2023-01-21
Supplement: s1 [file s1]

**Table S1.** Codes used to identify urinary tract infections.

| <b>International Classification of Diseases,<br/>Ninth Revision, Clinical Modification<br/>(ICD-9-CM) codes</b> | <b>International Classification of Diseases,<br/>Tenth Revision, Clinical Modification<br/>(ICD-10-CM) codes</b> |
|-----------------------------------------------------------------------------------------------------------------|------------------------------------------------------------------------------------------------------------------|
| 590.10                                                                                                          | N10                                                                                                              |
| 590.11                                                                                                          | N12                                                                                                              |
| 590.2                                                                                                           | N15.1                                                                                                            |
| 590.3                                                                                                           | N15.9                                                                                                            |
| 590.80                                                                                                          | N16                                                                                                              |
| 590.81                                                                                                          | N28.84                                                                                                           |
| 590.9                                                                                                           | N28.85                                                                                                           |
| 595.0                                                                                                           | N28.86                                                                                                           |
| 595.9                                                                                                           | N30.00                                                                                                           |
| 599.0                                                                                                           | N30.01                                                                                                           |
|                                                                                                                 | N30.90                                                                                                           |
|                                                                                                                 | N30.91                                                                                                           |
|                                                                                                                 | N39.0                                                                                                            |

**Table S2.** Urinary tract infection prophylaxis antibiotics.

| Medication name               |
|-------------------------------|
| Nitrofurantoin                |
| Sulfamethoxazole/trimethoprim |
| Trimethoprim                  |
| Cephalexin                    |
| Cefaclor                      |
| Ciprofloxacin                 |
| Levofloxacin                  |
| Norfloxacin                   |
| Ofloxacin                     |
| Gatifloxacin                  |
| Nalidixic acid                |
| Cinoxacin                     |
| Fosfomycin                    |

**Table S3.** Characteristics of patients with recurrent urinary tract infection by gender and age.

|                         | n (%)                    |                          |                           |                            |                            |                            |                            |                            |                         |                           |
|-------------------------|--------------------------|--------------------------|---------------------------|----------------------------|----------------------------|----------------------------|----------------------------|----------------------------|-------------------------|---------------------------|
|                         | Females                  |                          |                           |                            |                            |                            |                            |                            | Males                   |                           |
|                         | Age<br>2-7<br>(n = 1043) | Age<br>8-14<br>(n = 497) | Age<br>15-17<br>(n = 749) | Age<br>18-24<br>(n = 1991) | Age<br>25-34<br>(n = 1695) | Age<br>35-44<br>(n = 2007) | Age<br>45-54<br>(n = 2738) | Age<br>55-63<br>(n = 2697) | Age<br>2-17<br>(n = 59) | Age<br>18-63<br>(n = 616) |
| Comorbidities           |                          |                          |                           |                            |                            |                            |                            |                            |                         |                           |
| Organ transplant        | --                       | 1<br>0.2%                | --                        | 3<br>0.2%                  | 1<br>0.1%                  | 4<br>0.2%                  | 7<br>0.3%                  | 9<br>0.3%                  | 1<br>1.7%               | 8<br>1.3%                 |
| Advanced kidney disease | --                       | --                       | --                        | 3<br>0.2%                  | 7<br>0.4%                  | 6<br>0.3%                  | 12<br>0.4%                 | 38<br>1.4%                 | 3<br>5.1%               | 14<br>2.3%                |
| Catheterization         | 11<br>1.1%               | 1<br>0.2%                | 2<br>0.3%                 | 5<br>0.3%                  | 12<br>0.7%                 | 7<br>0.4%                  | 26<br>1.0%                 | 25<br>0.9%                 | 2<br>3.4%               | 47<br>7.6%                |
| Neurogenic bladder      | 9<br>0.9%                | 3<br>0.6%                | 2<br>0.3%                 | 8<br>0.4%                  | 6<br>0.4%                  | 9<br>0.5%                  | 30<br>1.1%                 | 27<br>1.0%                 | 17<br>28.8%             | 58<br>9.4%                |
| Urinary retention       | 2<br>0.2%                | 4<br>0.8%                | 1<br>0.1%                 | 2<br>0.1%                  | 12<br>0.7%                 | 13<br>0.7%                 | 30<br>1.1%                 | 23<br>0.9%                 | 4<br>6.8%               | 78<br>12.7%               |
| Urologic abnormalities  | 11<br>1.1%               | 7<br>1.4%                | 4<br>0.5%                 | 17<br>0.9%                 | 23<br>1.4%                 | 26<br>1.3%                 | 38<br>1.4%                 | 46<br>1.7%                 | 2<br>3.4%               | 55<br>8.9%                |
| Neurologic condition    | 6<br>0.6%                | 5<br>1.0%                | 10<br>1.3%                | 12<br>0.6%                 | 17<br>1.0%                 | 30<br>1.5%                 | 69<br>2.5%                 | 60<br>2.2%                 | 13<br>22.0%             | 52<br>8.4%                |
| Urinary incontinence    | 92<br>8.8%               | 25<br>5.0%               | 9<br>1.2%                 | 9<br>0.5%                  | 26<br>1.5%                 | 51<br>2.5%                 | 125<br>4.6%                | 128<br>4.8%                | 10<br>17.0%             | 21<br>3.4%                |
| Urinary tract stones    | --                       | --                       | 8<br>1.1%                 | 30<br>1.5%                 | 39<br>2.3%                 | 56<br>2.8%                 | 63<br>2.3%                 | 68<br>2.5%                 | 1<br>1.7%               | 58<br>9.4%                |
| Diabetes                | 2<br>0.2%                | 2<br>0.4%                | 9<br>1.2%                 | 23<br>1.2%                 | 29<br>1.7%                 | 89<br>4.4%                 | 215<br>7.9%                | 411<br>15.2%               | 2<br>3.4%               | 79<br>12.8%               |
| Pregnancy               | --                       | --                       | 21<br>2.8%                | 95<br>4.8%                 | 378<br>22.3%               | 114<br>5.7%                | 6<br>0.2%                  | 4<br>0.2%                  | --                      | --                        |
| Year                    |                          |                          |                           |                            |                            |                            |                            |                            |                         |                           |
| 2004-2007               | 354<br>33.9%             | 180<br>36.2%             | 289<br>38.6%              | 525<br>26.4%               | 612<br>36.1%               | 734<br>36.6%               | 917<br>33.5%               | 875<br>32.4%               | 26<br>44.1%             | 217<br>35.2%              |
| 2008-2011               | 397<br>38.1%             | 171<br>34.4%             | 283<br>37.8%              | 757<br>38.0%               | 655<br>38.6%               | 745<br>37.1%               | 1030<br>37.6%              | 949<br>35.2%               | 22<br>37.3%             | 241<br>39.1%              |
| 2012-2015               | 292<br>28.0%             | 146<br>29.4%             | 177<br>23.6%              | 709<br>35.6%               | 428<br>25.3%               | 528<br>26.3%               | 791<br>28.9%               | 873<br>32.4%               | 11<br>18.6%             | 158<br>25.7%              |

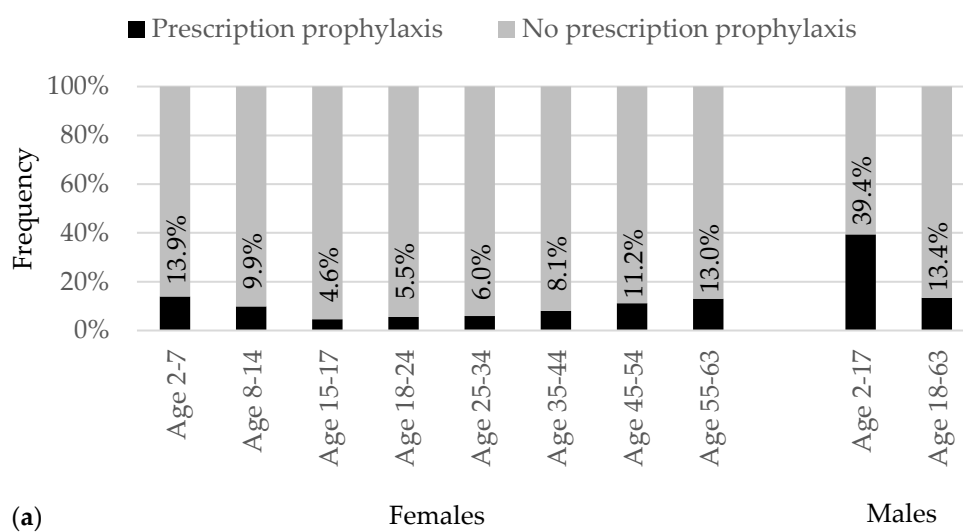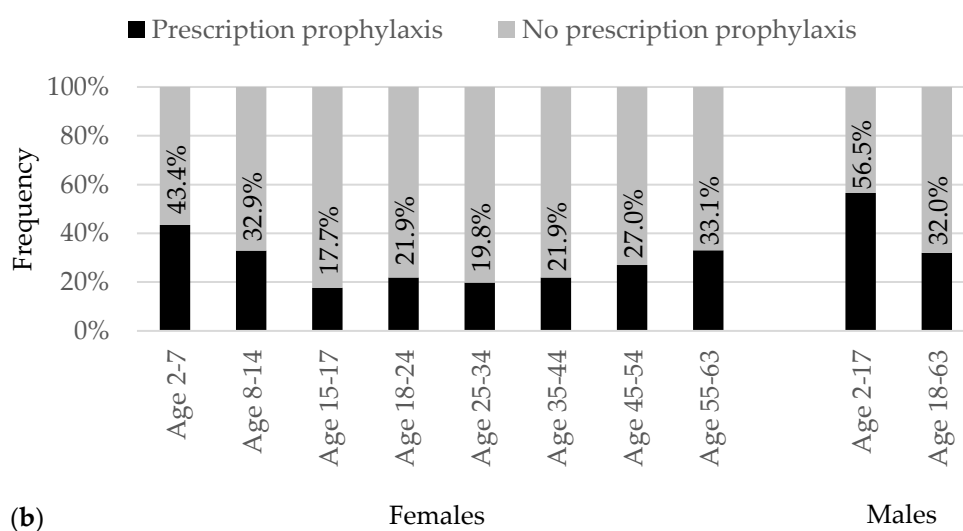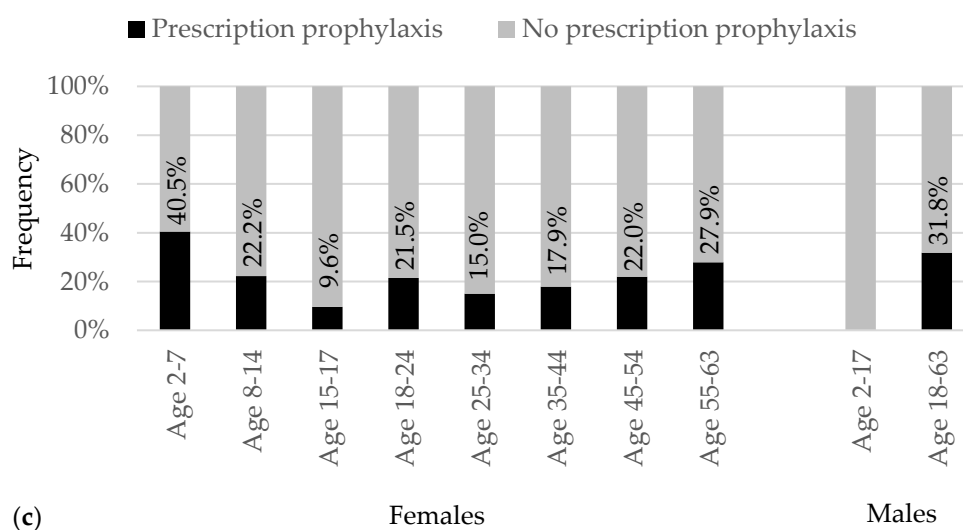

---

**Figure S1.** Frequency of receiving prescription prophylaxis by gender and age for (a) two infections, (b) three or more infections, met definition of recurrent urinary tract infection with second infection, and (c) three or more infections, met definition of recurrent urinary tract infection with third infection.
